# Supplementary material
Source: publisher figshare collection journal article supplement (https://acs.figshare.com/ndownloader/files/8742820)
Supplement: Supplementary file 1 [file 8742820]

## Supporting Information

### Enhanced Immune Adjuvant Activity of Aluminum Oxyhydroxide Nanorods through Cationic Surface Functionalization

Bingbing Sun<sup>a,b,\*</sup>, Zhaoxia Ji<sup>c</sup>, Yu-Pei Liao<sup>b</sup>, Chong Hyun Chang<sup>c</sup>, Xiang Wang<sup>b</sup>, Justine Ku<sup>d</sup>, Changying Xue<sup>e</sup>, Vahid Mirshafiee<sup>b</sup>, and Tian Xia<sup>b,\*</sup>

<sup>a</sup>State Key Laboratory of Fine Chemicals, School of Chemical Engineering, Dalian University of Technology, 2 Linggong Road, 116024, Dalian, China

<sup>b</sup>Division of NanoMedicine, Department of Medicine, University of California, Los Angeles, CA 90095, United States;

<sup>c</sup>California NanoSystems Institute, University of California, Los Angeles, CA 90095, United States;

<sup>d</sup>Department of Ecology and Evolutionary Biology, University of California, Los Angeles, CA 90095, United States;

<sup>e</sup>School of Life Science and Biotechnology, Dalian University of Technology, 2 Linggong Road, 116024, Dalian, China;

\*Address correspondence to txia@ucla.edu and bingbingsun@dlut.edu.cn.

**Figure S1**

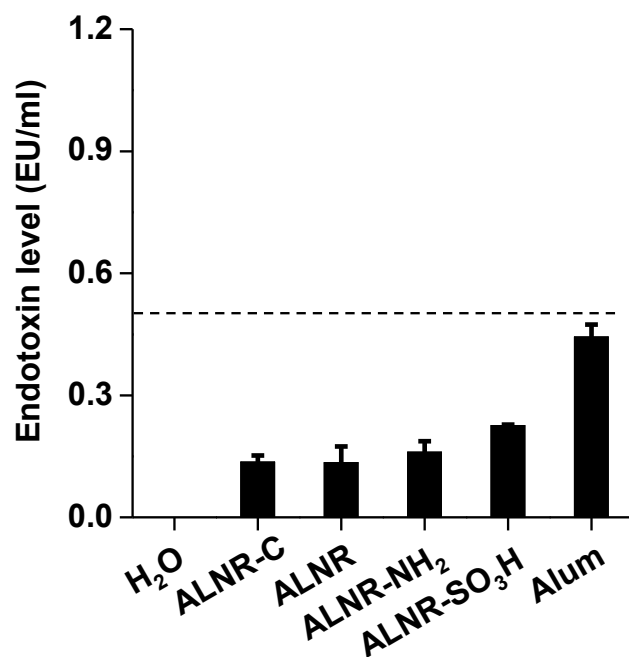

**Figure S1.** Endotoxin levels of ALNRs. The endotoxin levels in 25  $\mu$ g of ALNRs (resuspended at 250  $\mu$ g/mL) were determined using a Limulus Amebocyte Lysate assay kit (Lonza).

**Figure S2**

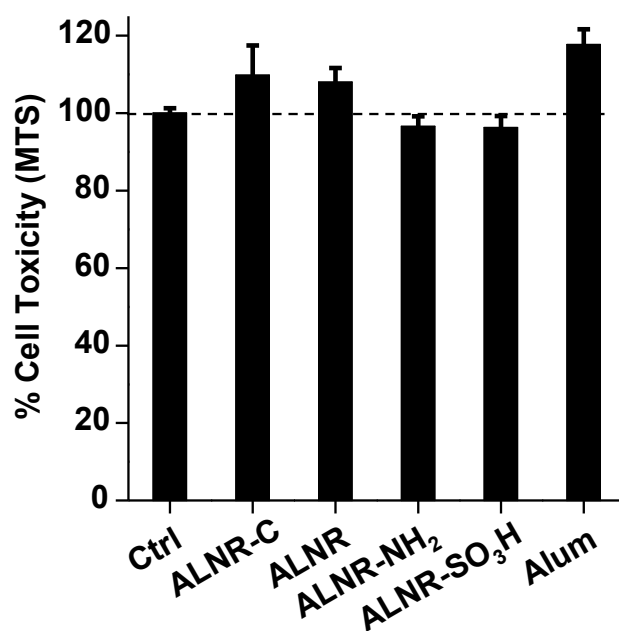

**Figure S2.** Cytotoxicity of ALNRs. Cell viability of THP-1 cells after exposure to ALNRs was determined using a MTS assay. The cell viability of the nanoparticle-treated cells was normalized according to the value of non-treated control cells, for which the vitality was regarded as 100%.

**Figure S3**

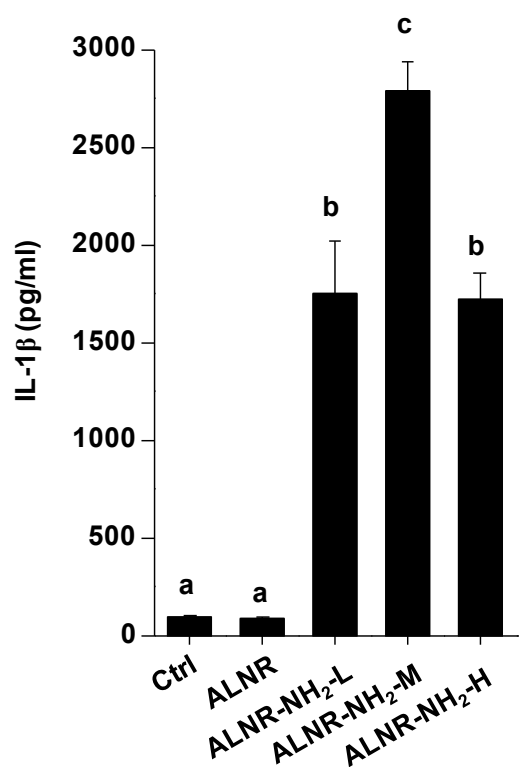

**Figure S3.** IL-1 $\beta$  production induced by ALNRs with different degree of NH<sub>2</sub> functionalization in THP-1 cells. (A) PMA-differentiated THP-1 cells were exposed to ALNRs with different degree of NH<sub>2</sub> functionalization (L, Low; M, Medium; H, High) at 500  $\mu$ g/mL in the presence of LPS (10 ng/mL) for 6 h. IL-1 $\beta$  production was quantified by ELISA. Statistical analysis was performed using Tukey's test. Values that do not share the same letter indicate statistical differences at  $p < 0.01$ .

**Figure S4**

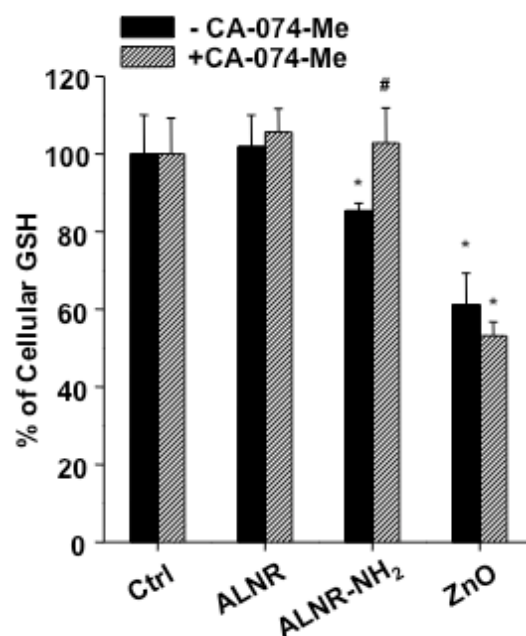

**Figure S4.** Cathepsin B inhibitor reduced oxidative stress induced by ALNR-NH<sub>2</sub> in THP-1 cells. PMA-differentiated THP-1 cells were pre-treated with 20  $\mu$ M inhibitor for 30 min, and then exposed to particles in the presence of LPS (10 ng/mL) for 24 h. Intracellular GSH level was determined using a GSH-Glo assay. Zinc oxide (ZnO) (50  $\mu$ g/mL) was used as a positive control. # $p$ <0.05 compared to THP-1 cells without CA-074-Me treatment; \* $p$ <0.05 compared to control.

**Figure S5**

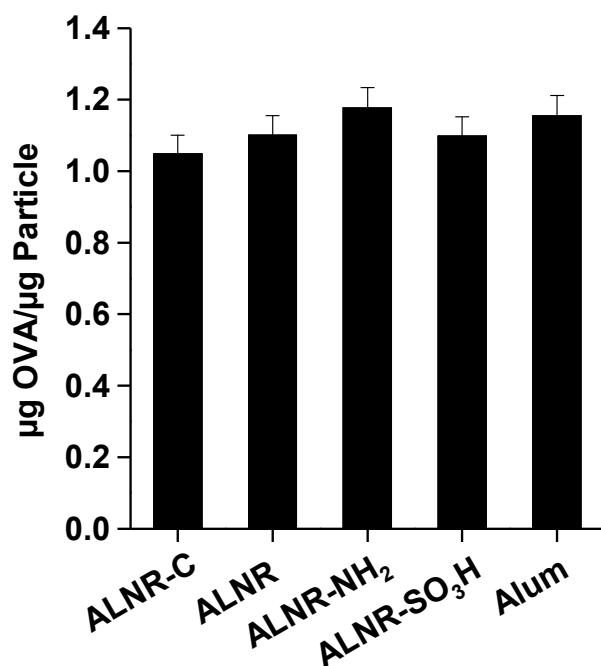

**Figure S5.** OVA binding efficiency to ALNRs. 100 µL of ALNRs (100 µg/mL in PBS) was mixed with 100 µL of OVA (100 µg/mL in PBS), and the mixture was incubated for 30 min at room temperature. The particles were centrifuged and the supernatant was collected to analyze the OVA concentration with a BCA protein assay.

**Table S1.** Peak assignments of FTIR analysis of aluminum oxyhydroxide nanorods with various surface functionalization.

| Wavenumber (cm <sup>-1</sup> ) | Assignments                                                              |
|--------------------------------|--------------------------------------------------------------------------|
| 3300                           | $\nu_{\text{as}}(\text{Al})\text{O-H}$ stretching vibration of OH groups |
| 3095                           | $\nu_{\text{s}}(\text{Al})\text{O-H}$ stretching vibration of OH groups  |
| 1558                           | Deformation vibration of N-H bond                                        |
| 1539                           | N-H bending vibration                                                    |
| 1413                           | $\nu_{\text{as}}(\text{SO}_2)$ stretching vibration                      |
| 1335                           | $\nu_{\text{as}}(\text{SO}_2)$ stretching vibration                      |
| 1156                           | ( $\nu_{\text{as}}\text{Al-O-H}$ ) OH deformation                        |
| 1067                           | ( $\nu_{\text{s}}\text{Al-O-H}$ ) OH deformation                         |
